# Supplementary material for: Highly efficient Sn-modified Pt/KY catalyst for n-octane reforming: the synergistic effect of Pt in different electronic states
Source: Royal Society of Chemistry journal article supplement (doi:10.1039/d3cy00011g), 2023-01-01
Supplement: d3cy00011g1.pdf [file d3cy00011g1.pdf]

*Supporting Information*

**Highly efficient Sn-modified Pt/KY catalyst for *n*-octane reforming:  
the synergistic effect of Pt in different electronic states**

Mengxia Yan<sup>a,c</sup>, Baoshan Wu<sup>a,b\*</sup>, Yong Yang<sup>a,b</sup>, Yongwang Li<sup>a,b</sup>

<sup>a</sup> State Key Laboratory of Coal Conversion, Institute of Coal Chemistry, Chinese Academy of Sciences, Taiyuan 030001, People's Republic of China.

<sup>b</sup> National Energy Research Center for Clean Fuels, Synfuels China Co., Ltd., Beijing 101400, People's Republic of China.

<sup>c</sup> University of Chinese Academy of Sciences, Beijing 100049, People's Republic of China.

\* Corresponding author

E-mail addresses: wbs@sxicc.ac.cn (B.S. Wu)

# Contents

## 1. List of Figures

|                                                                                                                            |     |
|----------------------------------------------------------------------------------------------------------------------------|-----|
| <b>Fig. S1</b> The NH <sub>3</sub> -TPD results of prepared KY sample.....                                                 | S3  |
| <b>Fig. S2</b> The Py-IR spectra of prepared KY sample.....                                                                | S4  |
| <b>Fig. S3</b> The N <sub>2</sub> adsorption-desorption isotherm of Pt/KYSn( <i>x</i> ) catalysts.....                     | S5  |
| <b>Fig. S4</b> The Pt 4f XPS spectra of Pt/KYSn( <i>x</i> ) catalysts.....                                                 | S6  |
| <b>Fig. S5</b> The products distribution over Pt/KYSn( <i>x</i> ) catalysts under similar <i>n</i> -octane conversion..... | S7  |
| <b>Fig. S6</b> The relationship between Pt <sup>δ+</sup> /Pt <sup>δ-</sup> and aromatization ability.....                  | S8  |
| <b>Table S1.</b> The detailed data of kinetics experiments over Pt/KYSn( <i>x</i> ) catalysts.....                         | S9  |
| <b>Fig. S7</b> The Arrhenius curve of Pt/KYSn( <i>x</i> ) catalysts for <i>n</i> -octane aromatization.....                | S10 |
| <b>Table S2.</b> The distribution of C <sub>8</sub> aromatics products over Pt/KYSn( <i>x</i> ) catalysts.....             | S11 |
| <b>Fig. S8</b> The HAADF-STEM images of used Pt/KYSn( <i>x</i> ) catalysts.....                                            | S12 |
| <b>Fig. S9</b> The aromatization of 1-octene over Pt/KYSn( <i>x</i> ) catalysts.....                                       | S13 |

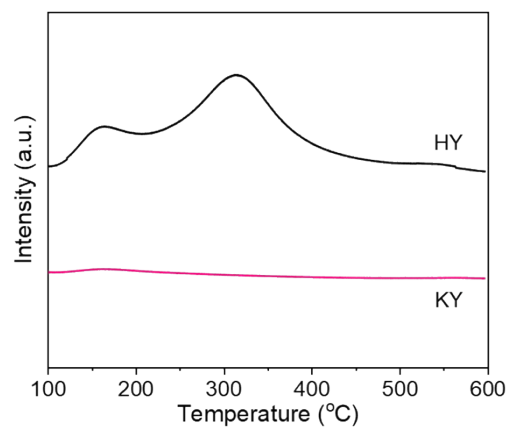

**Fig. S1** NH<sub>3</sub>-TPD results of obtained KY and parent HY zeolite.

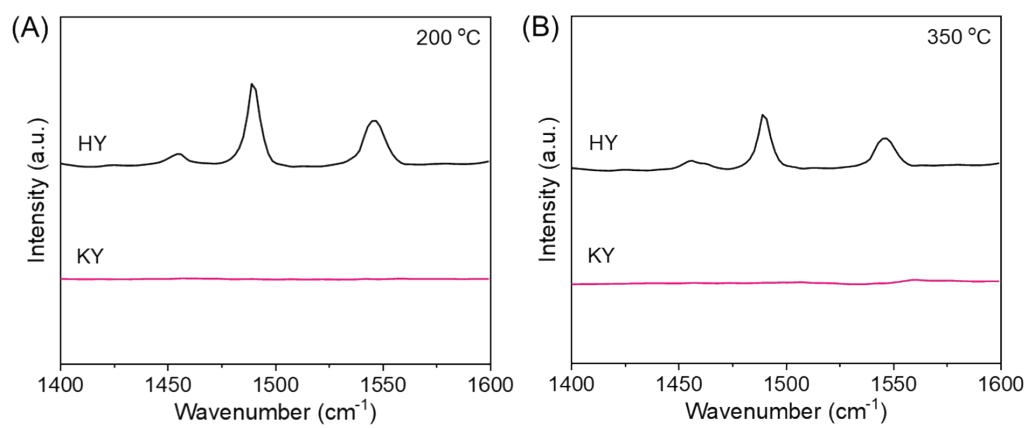

**Fig. S2** Py-IR spectra of obtained KY and parent HY zeolite: (A) 200 °C; (B) 350 °C.

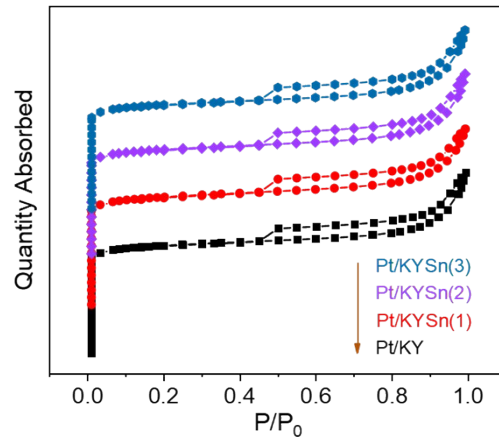

**Fig. S3** The N<sub>2</sub> adsorption-desorption isotherm of Pt/KYSn(x) catalysts.

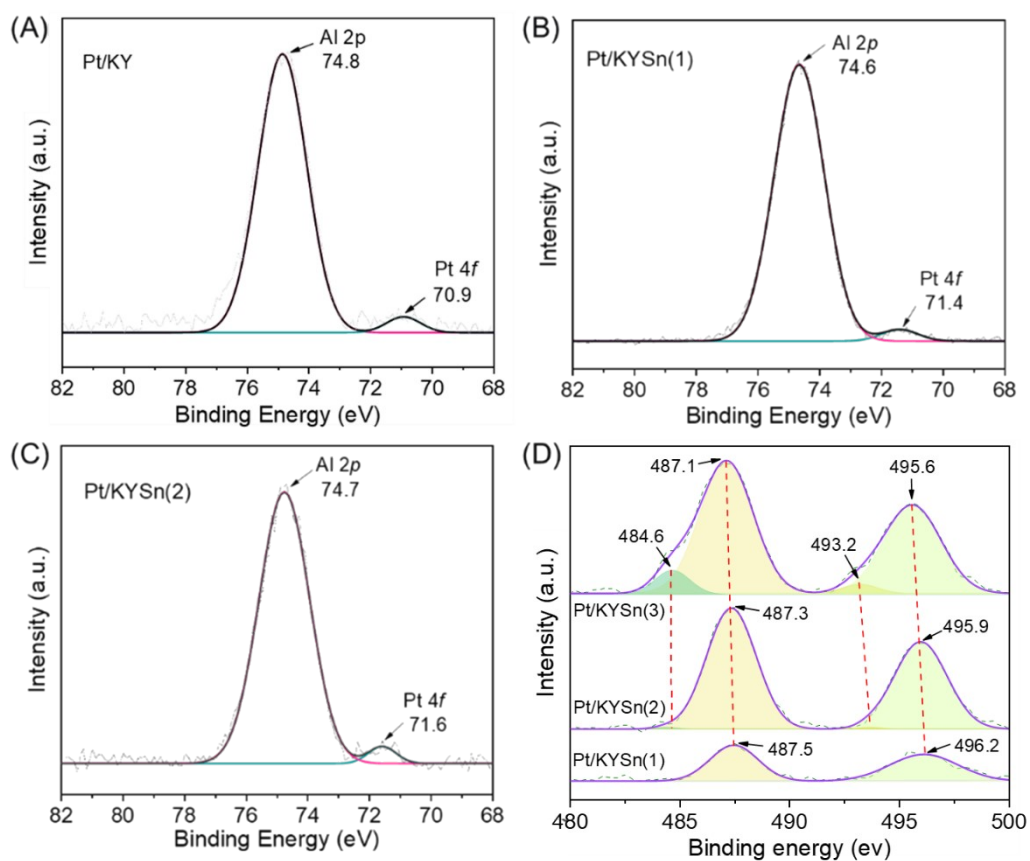

**Fig. S4** The Pt 4f XPS spectra of Pt/KYSn(x) catalysts: (A) Pt/KY; (B) Pt/KYSn(1); (C) Pt/KYSn(2) and (D) the Sn 3d spectra of Pt/KYSn(x) catalysts.

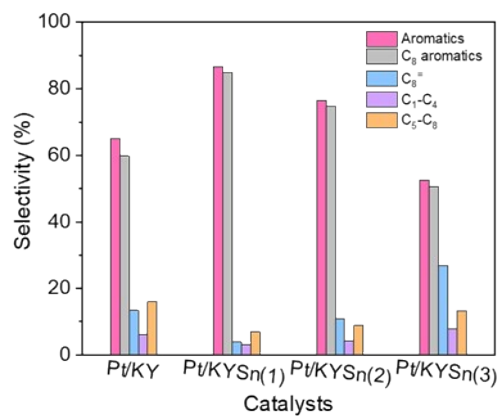

**Fig. S5** The comparison of products selectivity on obtained Pt/KYSn(*x*) catalysts at similar *n*-octane conversion (70%-80%). Note: The aromatics (benzene, toluene, ethylene and xylene) and octene were not included in C<sub>5</sub>-C<sub>8</sub> species (Reaction condition: 500 °C; 0.1 Mpa).

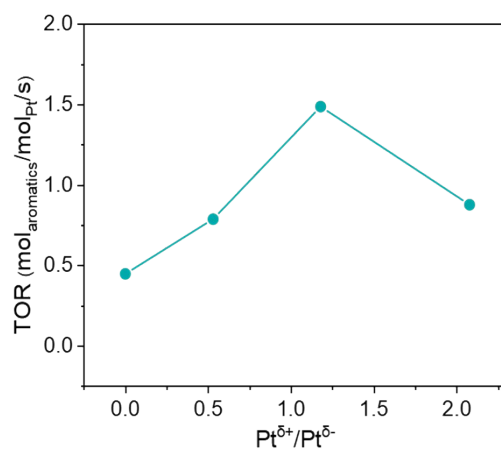

**Fig. S6** The relationship between Pt<sup>δ+</sup>/Pt<sup>δ-</sup> and aromatization ability. (Note: the value of Pt<sup>δ+</sup>/Pt<sup>δ-</sup> was calculated according to CO-DRIFTS results, and one of these points was obtained by analyzing the Pt/KYSn(0.5) catalyst with 0.06 wt% Sn content).



**Table S1.**

The detailed data of kinetics experiments over Pt/KYSn(x) catalysts.

| Catalysts  | Temperature (°C) | Conversion (%) | Reaction rate ( $10^{-7}$ mol g <sub>cat</sub> <sup>-1</sup> s <sup>-1</sup> ) |
|------------|------------------|----------------|--------------------------------------------------------------------------------|
| Pt/KY      | 373              | 10.1           | 3.11                                                                           |
|            | 376              | 11.7           | 3.60                                                                           |
|            | 382              | 15.0           | 4.63                                                                           |
| Pt/KYSn(1) | 348              | 13.6           | 4.19                                                                           |
|            | 351              | 15.0           | 4.63                                                                           |
|            | 353              | 16.9           | 5.21                                                                           |
| Pt/KYSn(2) | 363              | 12.7           | 3.90                                                                           |
|            | 365              | 14.0           | 4.31                                                                           |
|            | 367              | 15.0           | 4.63                                                                           |
| Pt/KYSn(3) | 455              | 12.2           | 3.76                                                                           |
|            | 459              | 13.7           | 4.22                                                                           |
|            | 465              | 17.1           | 5.27                                                                           |

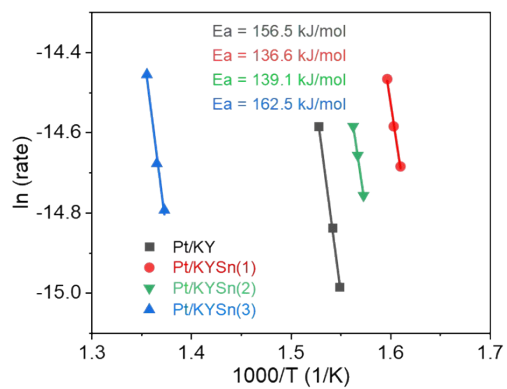

**Fig. S7** The Arrhenius curve of Pt/KYSn(x) catalysts for the *n*-octane aromatization.

**Table S2.** The distribution of C<sub>8</sub> aromatics products over Pt/KYSn(x) catalysts.

| Catalysts  | Sel. <sub>EB</sub> (%) | Sel. <sub>OX</sub> (%) | Sel. <sub>PX+MX</sub> (%) | EB/OX |
|------------|------------------------|------------------------|---------------------------|-------|
| Pt/KY      | 54.6                   | 41.8                   | 3.6                       | 1.31  |
| Pt/KYSn(1) | 44.6                   | 51.0                   | 4.4                       | 0.87  |
| Pt/KYSn(2) | 40.3                   | 49.0                   | 10.7                      | 0.82  |
| Pt/KYSn(3) | 41.4                   | 47.6                   | 11.0                      | 0.87  |

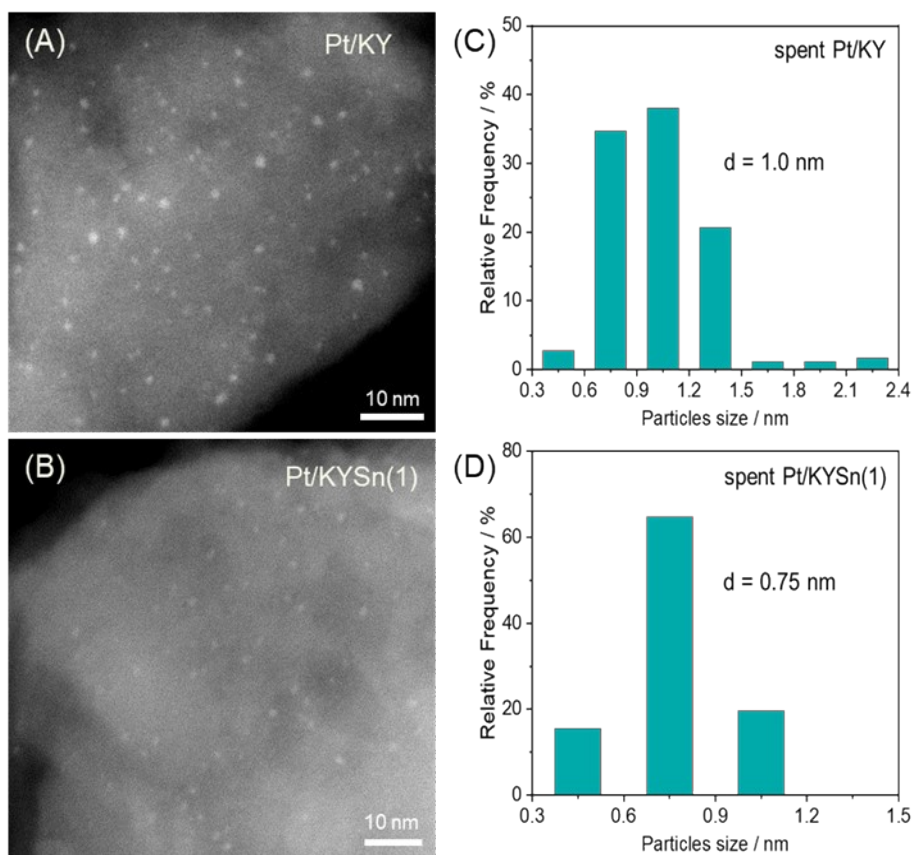

**Fig. S8** The HAADF-STEM images of used Pt/KYSn(x) catalysts: (A) Pt/KY; (B) Pt/KYSn(1) and the particles size distribution (C-D).

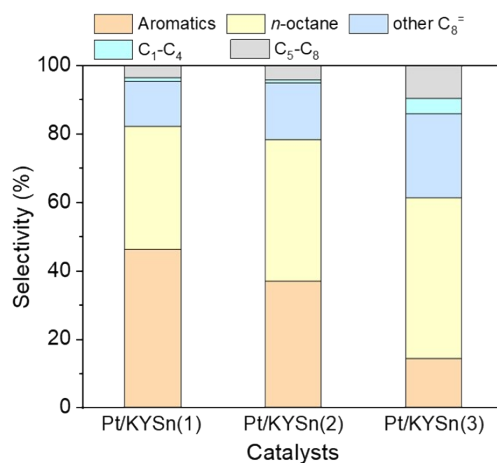

**Fig. S9** The aromatization of 1-octene over Pt/KYSn(*x*) catalysts (Reaction condition: T = 500 °C; 0.1

MPa; H<sub>2</sub>/*n*-octane = 6). Note: The aromatics (benzene, toluene, ethylene and xylene), octene and

*n*-octane were not included in C<sub>5</sub>-C<sub>8</sub> species.
